# Supplementary material for: Two chiral tetradecanuclear hydroxo-lanthanide clusters with luminescent and magnetic properties
Source: Royal Society of Chemistry journal article supplement (doi:10.1039/c0ce00826e), 2011-01-01
Supplement: c0ce00826e.pdf [file c0ce00826e.pdf]

## Supporting Information

### Two chiral tetradecanuclear hydroxo-lanthanide clusters with luminescent and magnetic properties

Xi-Li Li,<sup>\*a</sup> Lai-Fu He,<sup>a</sup> Xiang-Li Feng,<sup>a</sup> You Song,<sup>\*b</sup> Min Hu,<sup>a</sup> Li-Feng Han,<sup>a</sup>  
Xian-Jun Zheng,<sup>a</sup> Zhi-Hong Zhang<sup>a</sup> and Shao-Ming Fang<sup>\*a</sup>

<sup>a</sup>*Henan Provincial Key Laboratory of Surface and Interface Science, Zhengzhou University of Light Industry, Zhengzhou, 450002, China. E-mail: lixl@zzuli.edu.cn; Fax: +86 371 63556510.*

<sup>b</sup>*State Key Laboratory of Coordination Chemistry, School of Chemistry and Chemical Engineering, Nanjing National Laboratory of Microstructures, Nanjing University, Nanjing, 210093, China.*

**Materials and methods.** All reagents were of commercial origin and were used as received. The C and H microanalyses were carried out with a Perkin-Elmer 240C analyzer. Infrared spectra were performed on TENSOR27 Bruker spectrophotometer with KBr pellets in the 4000 – 400 cm<sup>-1</sup> region. Magnetic susceptibility measurements for the crystalline samples were obtained with the use of a Quantum Design MPMS-XL7 SQUID magnetometer in the temperature range 1.8–300 K. The photoluminescence spectra were recorded on a HITACHI F7000 Fluorescence Spectrophotometer at room temperature.

**Synthesis of Dy<sub>14</sub>(μ<sub>4</sub>-OH)<sub>2</sub>(μ<sub>3</sub>-OH)<sub>16</sub>(μ-η<sup>2</sup>-acac)<sub>8</sub>(η<sup>2</sup>-acac)<sub>16</sub>·6H<sub>2</sub>O (1).**  
an aqueous solution of NH<sub>4</sub>acac (75 mL, 2 mol/L) was added slowly with stirring to a solution of 0.1 mmol DyCl<sub>3</sub>·6H<sub>2</sub>O (0.38 g) in 10 mL cold

water.  $\text{NH}_3 \cdot \text{H}_2\text{O}$  (1.0 M) was added to keep pH value being 7.0-7.5 and result in white precipitate. Stirring was continued for about 5 hours. The white precipitate was filtered, washed with sufficient water and air-dried in about 67% yield (based on  $\text{DyCl}_3$ ). The block colorless crystals of **1** were obtained by recrystallization using  $\text{CH}_2\text{Cl}_2$ /petroleum ether mixed solvents (10 mL). Elemental analysis (%) calcd. for **1** ( $\text{C}_{120}\text{H}_{198}\text{O}_{72}\text{Dy}_{14}$ ): C 28.42, H 3.91; Found: C 28.76, H 3.69. IR data (KBr,  $\text{cm}^{-1}$ ):  $\nu$  1617 s(C=O stretching),  $\nu$  3473 m(O–H stretching),  $\nu$  1517 s(enol C=C stretching in acac).

**Synthesis of  $\text{Tb}_{14}(\mu_4\text{-OH})_2(\mu_3\text{-OH})_{16}(\mu\text{-}\eta^2\text{-acac})_8(\eta^2\text{-acac})_{16} \cdot 6\text{H}_2\text{O}$  (**2**).**

This compound was prepared using the same procedure as described above for the synthesis of **1**, but using  $\text{TbCl}_3 \cdot 6\text{H}_2\text{O}$  (0.1 mmol, 0.37 g) in place of  $\text{DyCl}_3 \cdot 6\text{H}_2\text{O}$ . The product was obtained as white solids in about 71% yield (based on  $\text{TbCl}_3$ ). The block colorless crystals of **2** were obtained using the same method as that of **1**. Anal. Calcd. (found) for **2**,  $\text{C}_{120}\text{H}_{198}\text{O}_{72}\text{Tb}_{14}$  (%): C, 28.69(28.57); H, 3.95(3.72). IR data (KBr,  $\text{cm}^{-1}$ ):  $\nu$  1617 s(C=O stretching),  $\nu$  3473 m(O–H stretching),  $\nu$  1517 s(enol C=C stretching in acac).

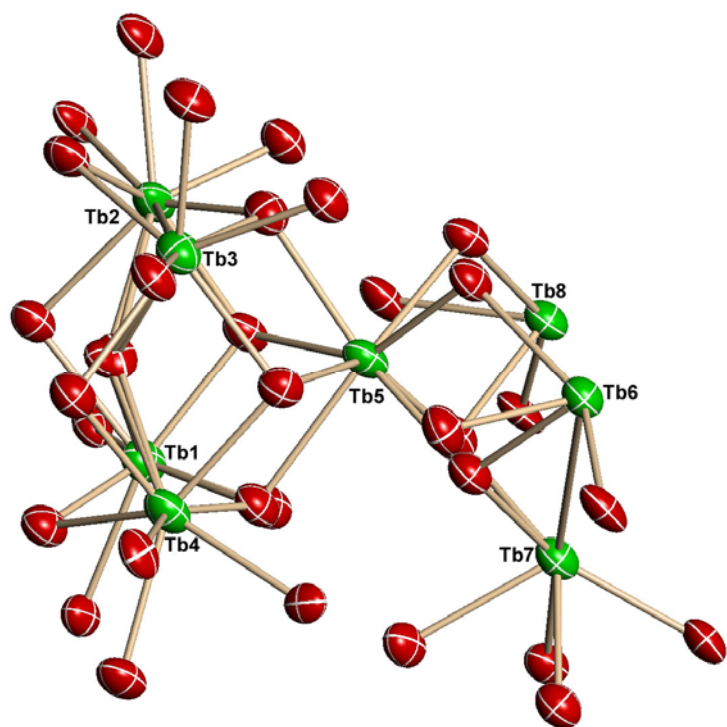

**Figure S1.** The asymmetrical unit of **2** showing thermal ellipsoids at the 50% probability level with labeling Tb atoms. All hydrogen atoms, carbon atoms and lattice water molecules are omitted for clarity. Tb: green; O: red.

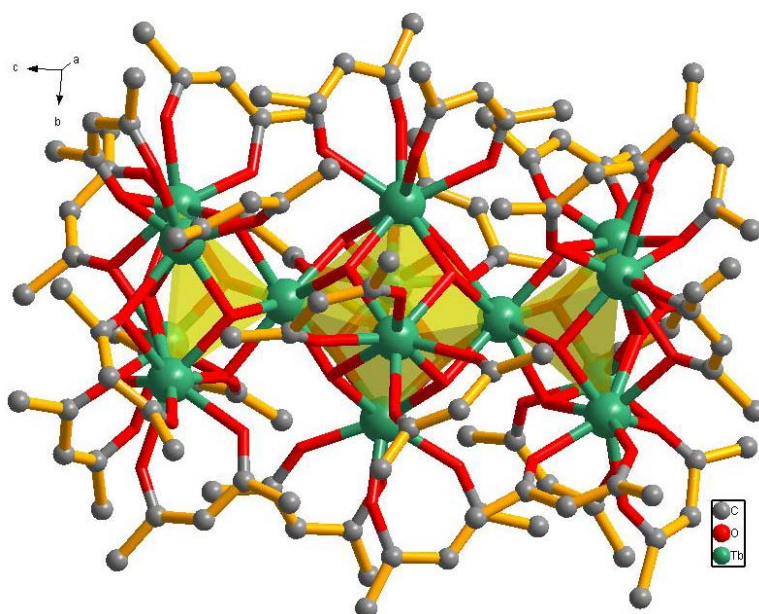

**Figure S2.** The molecular structure of **2**. Hydrogen atoms are omitted for clarity.

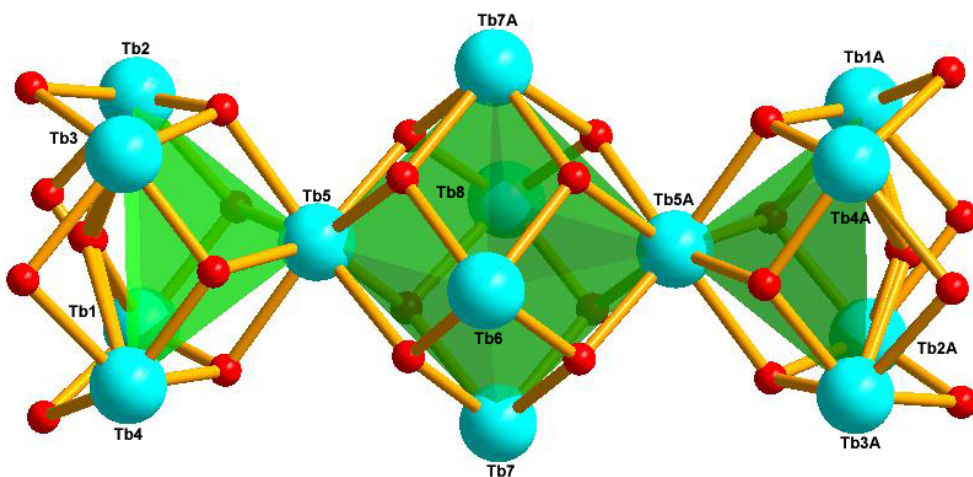

**Figure S3.** Polyhedral representation of the structure of  $[\text{Tb}_{14}(\mu_4\text{-OH})_2(\mu_3\text{-OH})_{16}]^{24+}$  cluster core, in which one octahedral  $[\text{Tb}_6(\mu_3\text{-OH})_8]^{10+}$  unit shares two opposing apices (Tb5 and Tb5A atoms) with two  $[\text{Tb}_5(\mu_4\text{-OH})(\mu_3\text{-OH})_4]^{10+}$  square pyramid units. Tb: cyan; O: red.

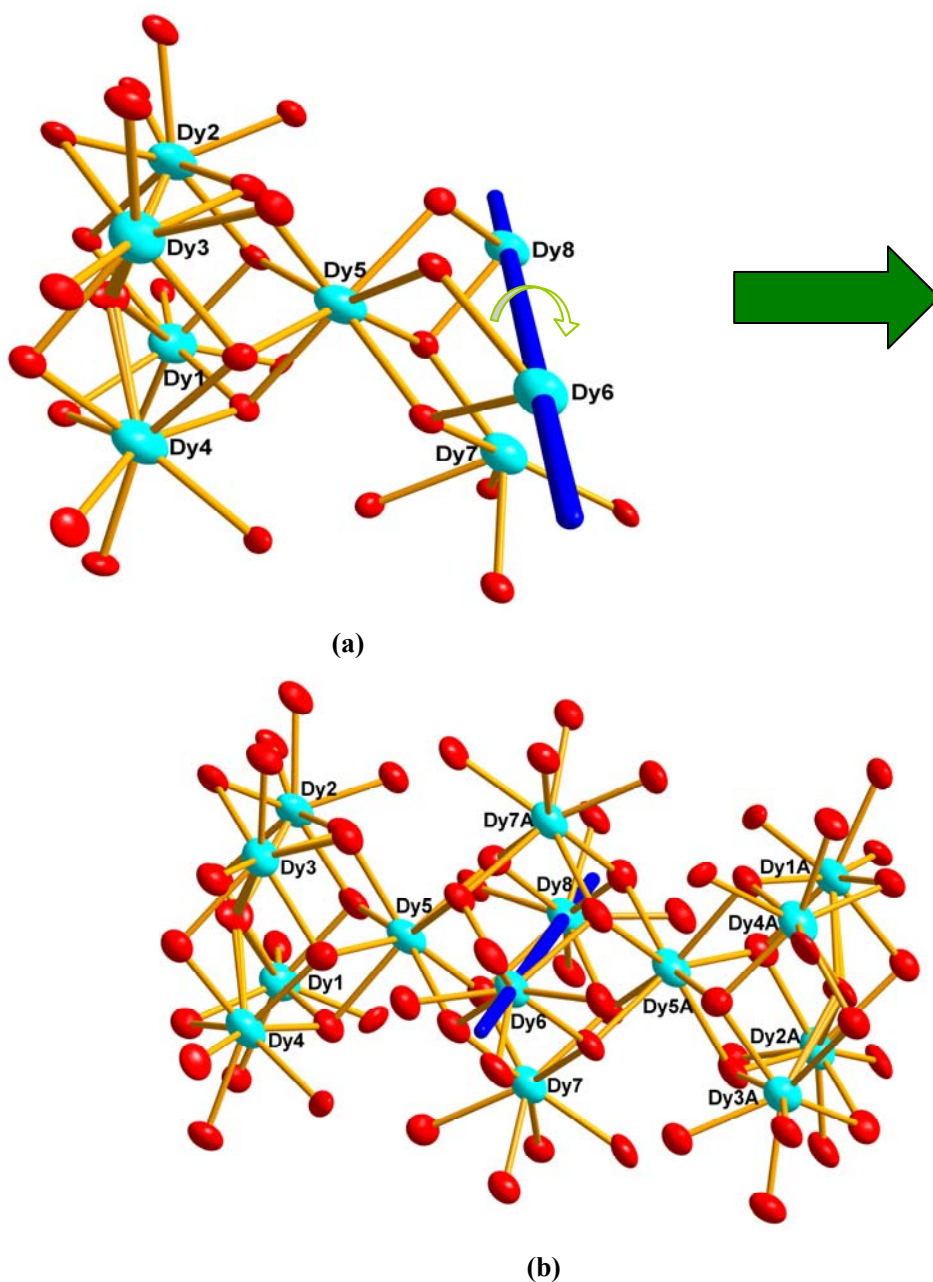

**Scheme S1.** The representation of structural formation of chiral complex **1**, in which the asymmetric unit of **1** (a) changes to its chiral structure (b) by the  $C_2$  chiral axis passing through the Dy6 and Dy8. All hydrogen atoms, carbon atoms and lattice water molecules are omitted for clarity. O: red; Dy: Cyan;  $C_2$  chiral axis: blue.
